# Supplementary material for: An MCM modeling study of nitryl chloride (ClNO 2 ) impacts on oxidation, ozone production and nitrogen oxide partitioning in polluted continental outflow
Source: Copernicus journal article supplement (doi:10.5194/acp-14-3789-2014), 2014-04-16
Supplement: Supplementary file 1 [file acp-14-3789-2014-supplement.pdf]

## SUPPORTING INFORMATION

### **An MCM modeling study of nitryl chloride (ClNO<sub>2</sub>) impacts on oxidation, ozone production and nitrogen oxide partitioning in polluted continental outflow**

**Theran P. Riedel<sup>1,2</sup>, Glenn M. Wolfe<sup>3,4</sup>, Kenten T. Danas<sup>2</sup>, Jessica B. Gilman<sup>5,6</sup>, William C. Kuster<sup>5,6</sup>, Daniel M. Bon<sup>5,6</sup>, Alexander Vlasenko<sup>7</sup>, Shao-Meng Li<sup>7</sup>, Eric J. Williams<sup>5,6</sup>, Brian M. Lerner<sup>5,6</sup>, Patrick R. Veres<sup>5,6</sup>, James M. Roberts<sup>5</sup>, John S. Holloway<sup>5</sup>, Barry Lefer<sup>9</sup>, Steven S. Brown<sup>5</sup>, Joel A. Thornton<sup>2</sup>**

(1) Department of Chemistry, University of Washington, Seattle, Washington, USA

(2) Department of Atmospheric Sciences, University of Washington, Seattle, Washington, USA

(3) Joint Center for Earth Systems Technology, University of Maryland Baltimore County, Baltimore, Maryland, USA

(4) Atmospheric Chemistry and Dynamics Laboratory, NASA Goddard Space Flight Center, Greenbelt, Maryland, USA

(5) NOAA Earth System Research Laboratory, Boulder, Colorado, USA

(6) Cooperative Institute for Research in Environmental Sciences, University of Colorado, Boulder, Colorado, USA

(7) Air Quality Research Division, Science and Technology Branch, Environment Canada, Canada

(8) Department of Chemistry and Biochemistry, University of Colorado, Boulder, Colorado, USA

(9) Department of Earth and Atmospheric Sciences, University of Houston, Houston, Texas, USA

## Supplemental Figures and Tables

| Pasadena (GC-MS)       | R/V Atlantis (GC-FID) | R/V Atlantis (PTR-ToF-MS) | median (pptv) | 1 $\sigma$ |
|------------------------|-----------------------|---------------------------|---------------|------------|
| methanol               | methanol              |                           | 1220          | 180        |
| ethanol                |                       |                           | 1540          | 200        |
| isopropanol            |                       |                           | 320           | 50         |
| ethanal                | ethanal               |                           | 370           | 150        |
| methacrolein           |                       |                           | 10            | 10         |
| propanal               |                       |                           | 90            | 20         |
| butanal                |                       |                           | 20            | 4          |
| ethane                 |                       |                           | 3120          | 440        |
| propane                |                       | propane                   | 1940          | 330        |
| i-butane               |                       | i-butane                  | 510           | 70         |
| n-butane               |                       | n-butane                  | 1200          | 190        |
| i-pentane              |                       |                           | 780           | 100        |
| n-pentane              |                       | n-pentane                 | 350           | 40         |
| hexane                 |                       |                           | 250           | 30         |
| nonane                 |                       |                           | 40            | 2          |
| decane                 |                       |                           | 36            | 2          |
| undecane               |                       |                           | 34            | 4          |
| ethene                 |                       | ethene                    | 900           | 100        |
| propene                |                       | propene                   | 250           | 60         |
| cis-2-butene           |                       |                           | 10            | 2          |
| 1-butene               |                       | 1-butene                  | 25            | 5          |
| 2-methylpropene        |                       |                           | 80            | 20         |
| 1,3-butadiene          |                       |                           | 44            | 17         |
| trans-2-butene         |                       |                           | 33            | 7          |
| ethyne                 |                       | ethyne                    | 320           | 40         |
| propylbenzene          |                       |                           | 15            | 1          |
| isopropylbenzene       |                       |                           | 5             | 1          |
| benzaldehyde           |                       |                           | 40            | 8          |
| benzene                | benzene               | benzene                   | 65            | 5          |
| ethylbenzene           |                       |                           | 25            | 2          |
| o-methylethylbenzene   |                       |                           | 4             | 1          |
| 1,3,5-trimethylbenzene |                       |                           | 10            | 3          |
| phenylethene           |                       |                           | 14            | 2          |
| 1,2,4-trimethylbenzene |                       |                           | 25            | 5          |
| o-xylene               |                       |                           | 30            | 3          |
| toluene                | toluene               | toluene                   | 140           | 13         |
| 1,2,3-trimethylbenzene |                       |                           | 8             | 2          |
| methylvinylketone      |                       |                           | 16            | 25         |
| acetone                | acetone               |                           | 740           | 260        |
| methylethylketone      |                       |                           | 53            | 27         |
| alphapinene            |                       |                           | 13            | 8          |
| betapinene             |                       |                           | 8             | 4          |
| limonene               |                       |                           | 9             | 7          |
| isoprene               |                       |                           | 30            | 180        |

**Table S-1.** VOC measured during CalNex 2010 at the Pasadena, CA, ground site and aboard the R/V *Atlantis* and used as model constraints. Medians and standard deviations for the diurnal values used in the model are also given.

## Reaction\*

## k\*\*

|                                                                                                          |                                                                                                                                                       |
|----------------------------------------------------------------------------------------------------------|-------------------------------------------------------------------------------------------------------------------------------------------------------|
| $\text{N}_2\text{O}_5 \rightarrow \text{ClNO}_2 + \text{HNO}_3$                                          | $\gamma\omega S_A / 4$<br>$\phi\gamma\omega S_A / 4$ (for $\text{ClNO}_2$ formation)<br>$(2-\phi)\gamma\omega S_A / 4$ (for $\text{HNO}_3$ formation) |
| $\text{ClNO}_2 + h\nu \rightarrow \text{Cl} + \text{NO}_2$                                               | $j_{\text{ClNO}_2}$                                                                                                                                   |
| $\text{Cl} + \text{CH}_3\text{OH} \rightarrow \text{HCHO} + \text{HO}_2 + \text{HCl}$                    | $1.4\text{e-}10 \cdot \exp(-280/T)$                                                                                                                   |
| $\text{Cl} + \text{C}_2\text{H}_5\text{OH} \rightarrow \text{CH}_3\text{CHO} + \text{HO}_2 + \text{HCl}$ | $0.92 \cdot 6.0\text{e-}11 \cdot \exp(155/T)$                                                                                                         |
| $\text{Cl} + \text{C}_2\text{H}_5\text{OH} \rightarrow \text{HOCH}_2\text{CH}_2\text{O}_2 + \text{HCl}$  | $0.08 \cdot 6.0\text{e-}11 \cdot \exp(155/T)$                                                                                                         |
| $\text{Cl} + \text{IPROPOL} \rightarrow \text{CH}_3\text{COCH}_3 + \text{HO}_2 + \text{HCl}$             | $7.4\text{e-}11$                                                                                                                                      |
| $\text{Cl} + \text{IPROPOL} \rightarrow \text{IPROPOLO}_2 + \text{HCl}$                                  | $1.3\text{e-}11$                                                                                                                                      |
| $\text{Cl} + \text{C}_2\text{H}_4 \rightarrow \text{CH}_2\text{CLCH}_2\text{O}_2$                        | $1.1\text{e-}10$                                                                                                                                      |
| $\text{Cl} + \text{C}_3\text{H}_6 \rightarrow \text{CH}_2\text{CLCHOOCH}_3$                              | $0.4 \cdot 2.7\text{e-}10$                                                                                                                            |
| $\text{CH}_2\text{CLCHOOCH}_3 + \text{NO} \rightarrow \text{CH}_2\text{CLCOCH}_3$                        | $2.9\text{e-}12 \cdot \exp(350/T)$ (k from MCM for $\text{NC}_3\text{H}_7\text{O}_2 + \text{NO}$ )                                                    |
| $\text{Cl} + \text{C}_3\text{H}_6 \rightarrow \text{CH}_3\text{CHCLCH}_2\text{OO}$                       | $0.5 \cdot 2.7\text{e-}10$                                                                                                                            |
| $\text{CH}_3\text{CHCLCH}_2\text{OO} + \text{NO} \rightarrow \text{CHOCHCLCH}_3$                         | $2.9\text{e-}12 \cdot \exp(350/T)$ (k from MCM for $\text{NC}_3\text{H}_7\text{O}_2 + \text{NO}$ )                                                    |
| $\text{CHOCHCLCH}_3 + \text{NO}_3 \rightarrow \text{C}_2\text{H}_5\text{CLCO}_3$                         | $3.24\text{e-}12 \cdot \exp(-1860/T)$ (k from MCM for propanal+ $\text{NO}_3$ )                                                                       |
| $\text{CHOCHCLCH}_3 + \text{OH} \rightarrow \text{C}_2\text{H}_5\text{CLCO}_3$                           | $4.9\text{e-}12 \cdot \exp(405/T)$ (k from MCM for propanal+OH)                                                                                       |
| $\text{C}_2\text{H}_5\text{CLCO}_3 + \text{HO}_2 \rightarrow \text{CH}_3\text{CHCLO}_2$                  | $\text{KAPHO}_2 \cdot 0.44$ (k from MCM for $\text{C}_2\text{H}_5\text{CO}_3 + \text{HO}_2$ )                                                         |
| $\text{C}_2\text{H}_5\text{CLCO}_3 + \text{HO}_2 \rightarrow \text{CH}_3\text{CHCLCO}_3\text{H}$         | $\text{KAPHO}_2 \cdot 0.41$ (k from MCM for $\text{C}_2\text{H}_5\text{CO}_3 + \text{HO}_2$ )                                                         |
| $\text{CH}_3\text{CHCLCO}_3\text{H} + \text{OH} \rightarrow \text{C}_2\text{H}_5\text{CLCO}_3$           | $4.42\text{e-}12$ (k from MCM for $\text{PERPROACID} + \text{OH}$ )                                                                                   |
| $\text{CH}_3\text{CHCLCO}_3\text{H} + h\nu \rightarrow \text{CH}_3\text{CHCLO}_2 + \text{OH}$            | j-value for $\text{PERPROACID}$ from MCM                                                                                                              |
| $\text{C}_2\text{H}_5\text{CLCO}_3 + \text{HO}_2 \rightarrow \text{CH}_3\text{CHCLCOOH} + \text{O}_3$    | $\text{KAPHO}_2 \cdot 0.15$ (k from MCM for $\text{C}_2\text{H}_5\text{CO}_3 + \text{HO}_2$ )                                                         |
| $\text{CH}_3\text{CHCLCOOH} + \text{OH} \rightarrow \text{CH}_3\text{CHCLO}_2$                           | $1.2\text{e-}12$ (k from MCM for $\text{PROPACID} + \text{OH}$ )                                                                                      |
| $\text{C}_2\text{H}_5\text{CLCO}_3 + \text{NO} \rightarrow \text{CH}_3\text{CHCLO}_2 + \text{NO}_2$      | $6.7\text{e-}12 \cdot \exp(340/T)$ (k from MCM for $\text{C}_2\text{H}_5\text{CO}_3 + \text{NO}$ )                                                    |
| $\text{C}_2\text{H}_5\text{CLCO}_3 + \text{NO}_2 \rightarrow 2\text{CLPPN}$                              | $\text{KFPAN}$ (k from MCM for $\text{C}_2\text{H}_5\text{CO}_3 + \text{NO}_2$ )                                                                      |
| $2\text{CLPPN} + \text{OH} \rightarrow \text{CLETAL} + \text{CO} + \text{NO}_2$                          | $1.27\text{e-}12$ (k from MCM for $\text{PPN} + \text{OH}$ )                                                                                          |
| $2\text{CLPPN} \rightarrow \text{C}_2\text{H}_5\text{CLO}_3 + \text{NO}_2$                               | $1.7\text{e-}3 \cdot \exp(-11280/T)$ (k from MCM for $\text{PPN}$ decomposition)                                                                      |
| $\text{C}_2\text{H}_5\text{CLCO}_3 + \text{NO}_3 \rightarrow \text{CH}_3\text{CHCLO}_2$                  | $\text{KRO}_2\text{NO}_3 \cdot 1.74$ (k from MCM for $\text{C}_2\text{H}_5\text{CO}_3 + \text{NO}_3$ )                                                |
| $\text{C}_2\text{H}_5\text{CLCO}_3 \rightarrow \text{CH}_3\text{CHCLO}_2$                                | $1.00\text{e-}11 \cdot 0.7$ (k from MCM for $\text{C}_2\text{H}_5\text{CO}_3 + \text{RO}_2 \rightarrow \text{C}_2\text{H}_5\text{O}_2$ )              |
| $\text{C}_2\text{H}_5\text{CLCO}_3 \rightarrow \text{CH}_3\text{CHCLCOOH}$                               | $1.00\text{e-}11 \cdot 0.3$ (k from MCM for $\text{C}_2\text{H}_5\text{CO}_3 + \text{RO}_2 \rightarrow \text{PROPACID}$ )                             |
| $\text{CHOCHCLCH}_3 \rightarrow \text{CH}_3\text{CHCLO}_2 + \text{HO}_2 + \text{CO}$                     | j-value for propanal+hv from MCM                                                                                                                      |
| $\text{Cl} + \text{C}_3\text{H}_6 \rightarrow \text{CH}_2\text{C}_2\text{H}_3\text{O}_2 + \text{HCl}$    | $0.1 \cdot 2.7\text{e-}10$ % at 298K                                                                                                                  |
| $\text{CH}_2\text{C}_2\text{H}_3\text{O}_2 + \text{NO} \rightarrow \text{ACR}$                           | $\text{KRO}_2\text{NO}$ (k from MCM for $\text{ISOPDO}_2 + \text{NO}$ )                                                                               |
| $\text{Cl} + \text{HCHO} \rightarrow \text{HO}_2$                                                        | $8.1\text{e-}11 \cdot \exp(-34/T)$                                                                                                                    |
| $\text{Cl} + \text{CH}_3\text{CHO} \rightarrow \text{CH}_3\text{CO}_3$                                   | $8\text{e-}11$                                                                                                                                        |
| $\text{Cl} + \text{C}_2\text{H}_5\text{CHO} \rightarrow \text{C}_2\text{H}_5\text{CO}_3$                 | $1.3\text{e-}10$                                                                                                                                      |
| $\text{Cl} + \text{CH}_3\text{COCH}_3 \rightarrow \text{CH}_3\text{COCH}_2\text{O}_2$                    | $1.5\text{e-}11 \cdot \exp(-590/T)$                                                                                                                   |
| $\text{Cl} + \text{BENZENE} \rightarrow \text{products}$                                                 | $1.5\text{e-}15$ (Shi and Bernhard, 1997)                                                                                                             |
| $\text{Cl} + \text{STYRENE} \rightarrow \text{products}$                                                 | $3.6\text{e-}10$ (Shi and Bernhard, 1997)                                                                                                             |
| $\text{Cl} + \text{OXYL} \rightarrow \text{products}$                                                    | $1.5\text{e-}10$ (Shi and Bernhard, 1997)                                                                                                             |
| $\text{Cl} + \text{TOLUENE} \rightarrow \text{products}$                                                 | $5.9\text{e-}11$ (Shi and Bernhard, 1997)                                                                                                             |
| $\text{OH} + \text{HCl} \rightarrow \text{Cl}$                                                           | $2.6\text{e-}12 \cdot \exp(-350/T)$                                                                                                                   |

|                         |                                                                       |
|-------------------------|-----------------------------------------------------------------------|
| CL + O3 → CLO           | 2.8e-11*exp(-250/T)                                                   |
| CLO + NO → CL + NO2     | 6.2e-12*exp(295/T)                                                    |
| CLO + HO2 → HOCL        | 2.2e-12*exp(340/T)                                                    |
| CLO + NO2 → CLONO2      | 2.3399e-12                                                            |
| CLONO2 + hv → CL + NO3  | $j_{\text{ClONO}_2 + \text{hv} \rightarrow \text{Cl} + \text{NO}_3}$  |
| CLONO2 + hv → CLO + NO2 | $j_{\text{ClONO}_2 + \text{hv} \rightarrow \text{ClO} + \text{NO}_2}$ |
| HOCL + hv → CL + OH     | $j_{\text{HOCl} + \text{hv} \rightarrow \text{Cl} + \text{OH}}$       |
| CLONO2 → CL2 + HNO3     | $\gamma\omega S_A / 4$                                                |
| HOCL → CL2              | $\gamma\omega S_A / 4$                                                |
| CL2 + hv → 2CL          | $j_{\text{Cl}_2 + \text{hv} \rightarrow 2\text{Cl}}$                  |
| C5H8 + CL → products    | 4.27e-10                                                              |

\*The MCM designated name is provided for reactants and products (i.e. NO<sub>2</sub> = NO2, isopropanol = IPROPOL, etc.). Newly added species are assigned names similar to the MCM naming convention (i.e. ClNO<sub>2</sub> = CLNO2).

\*\*When available, the temperature dependent rate constants are provided. Otherwise rate constants are for 298K.

$\gamma$  = uptake coefficient for the given reactant with aerosol surface area;  $\phi$  = product yield;  $\omega$  = mean molecular speed of the given reactant (m/s);  $S_A$  = aerosol surface area concentration (m<sup>2</sup>/m<sup>3</sup>)

References:

Shi, J., and Bernhard, M. J.: Kinetic studies of Cl-atom reactions with selected aromatic compounds using the photochemical reactor-FTIR spectroscopy technique, International Journal of Chemical Kinetics, 29, 349-358, doi: 10.1002/(SICI)1097-4601(1997)29:5<349::AID-KIN5>3.0.CO;2-U, 1997.

**Table S-2.** Additional non-MCM reactions and associated rate constants used by the model.

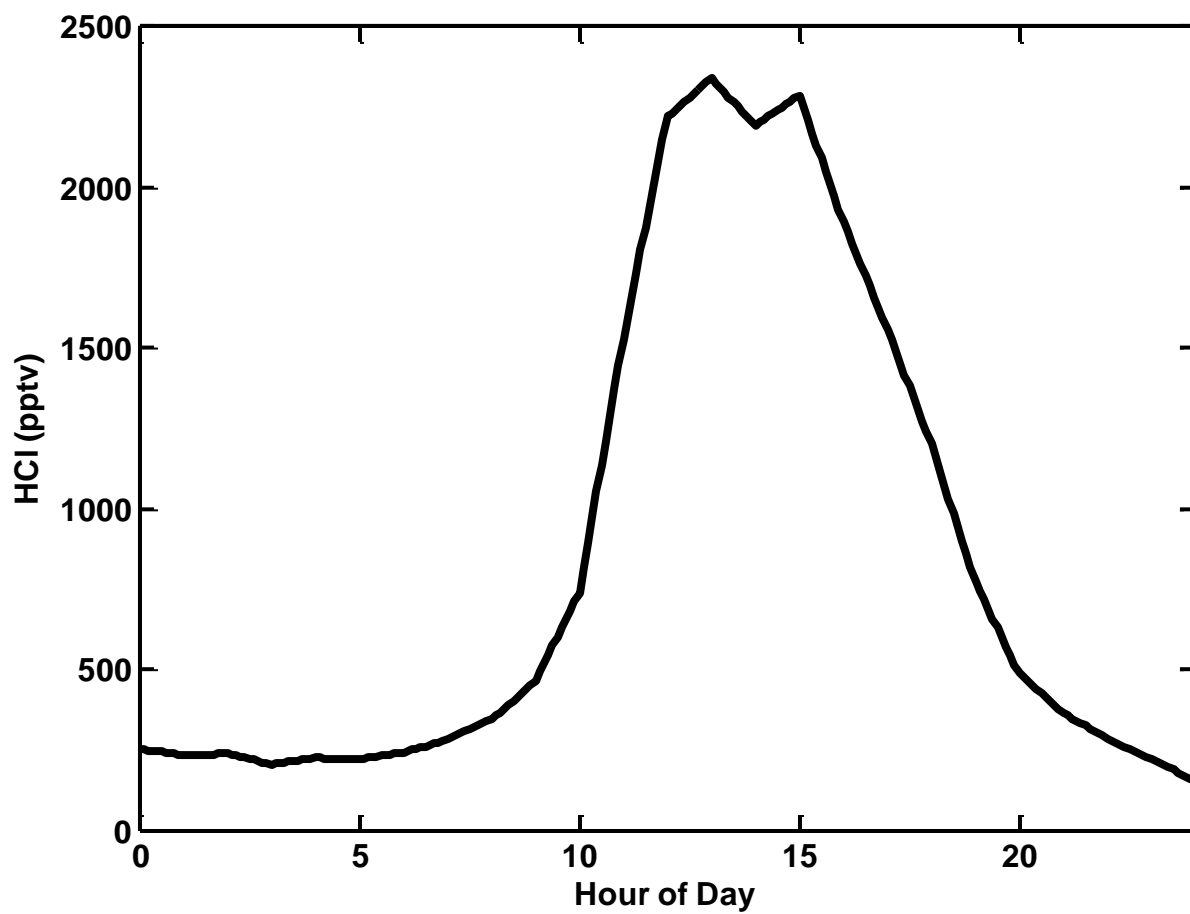

**Figure S-1.** Hydrochloric acid (HCl) diurnal profile used in the model.

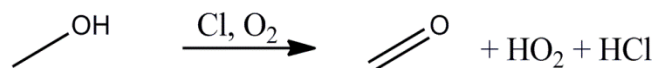

**Figure S-2.** Methanol oxidation mechanism by atomic chlorine added to the model reactions.

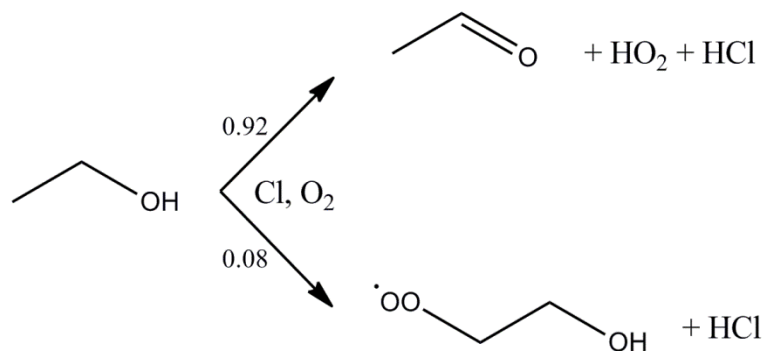

**Figure S-3.** Ethanol oxidation mechanism by atomic chlorine added to the model reactions.

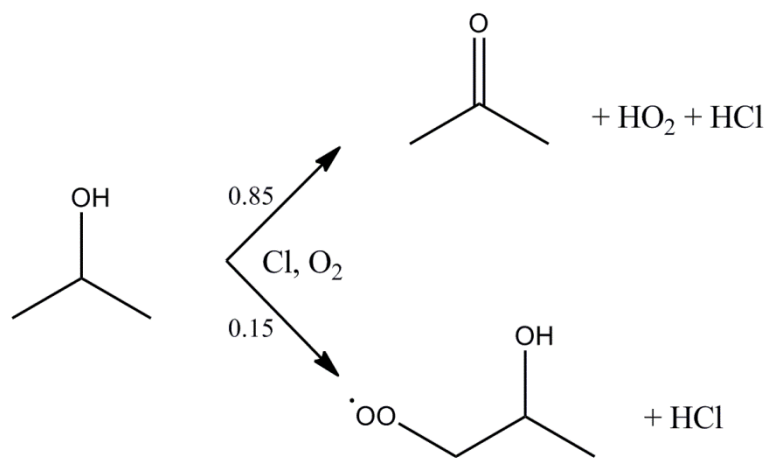

**Figure S-4.** Isopropanol oxidation mechanism by atomic chlorine added to the model reactions.

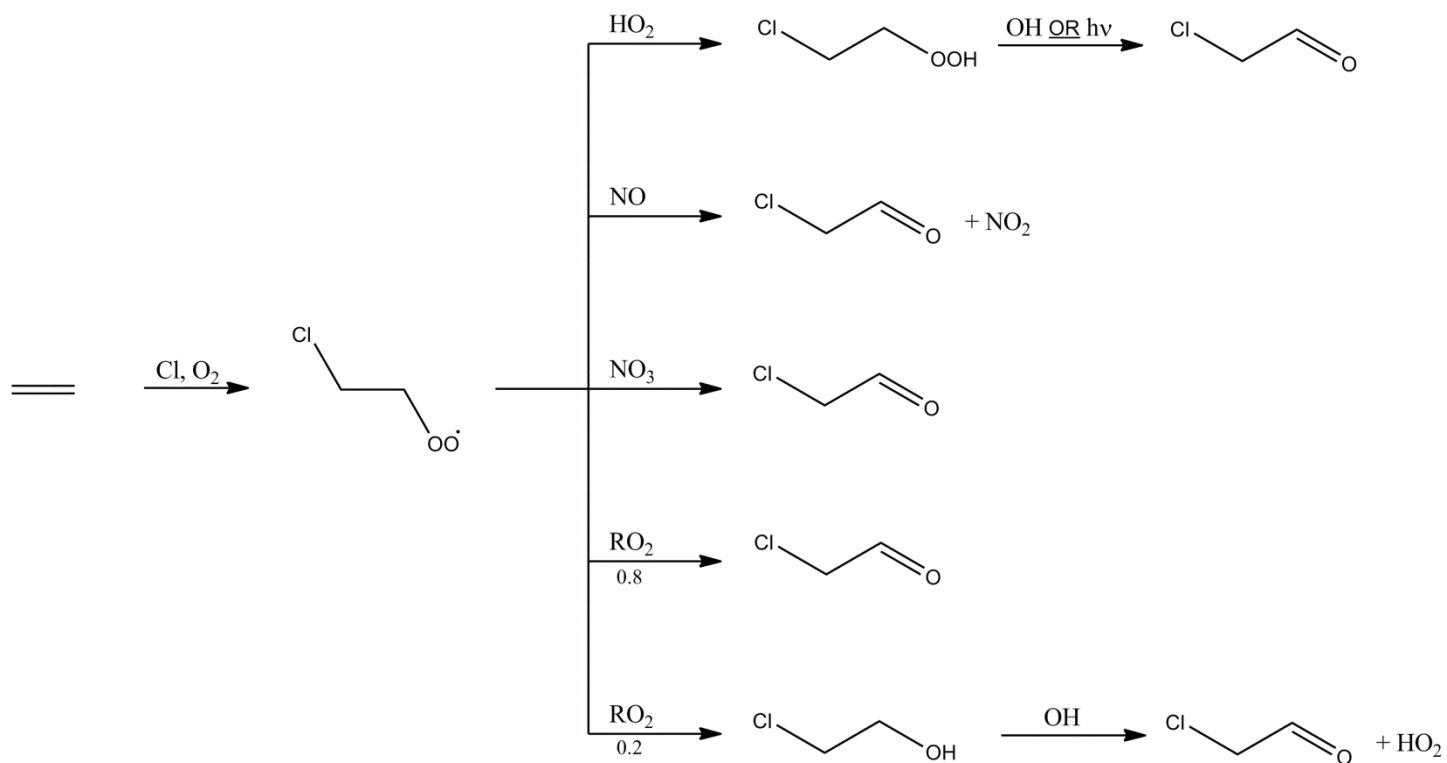

**Figure S-5.** Ethene oxidation mechanism by atomic chlorine added to the model reactions.

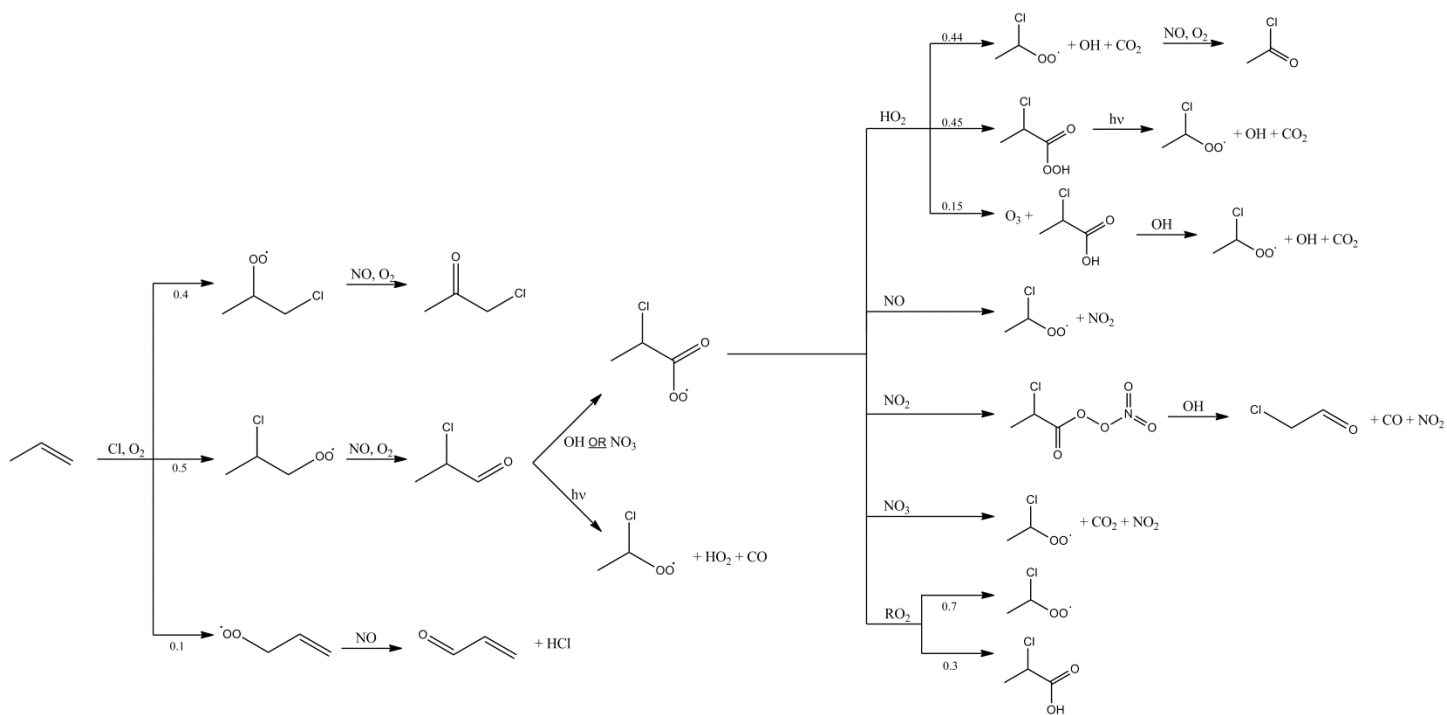

**Figure S-6.** Propene oxidation mechanism by atomic chlorine added to the model reactions.

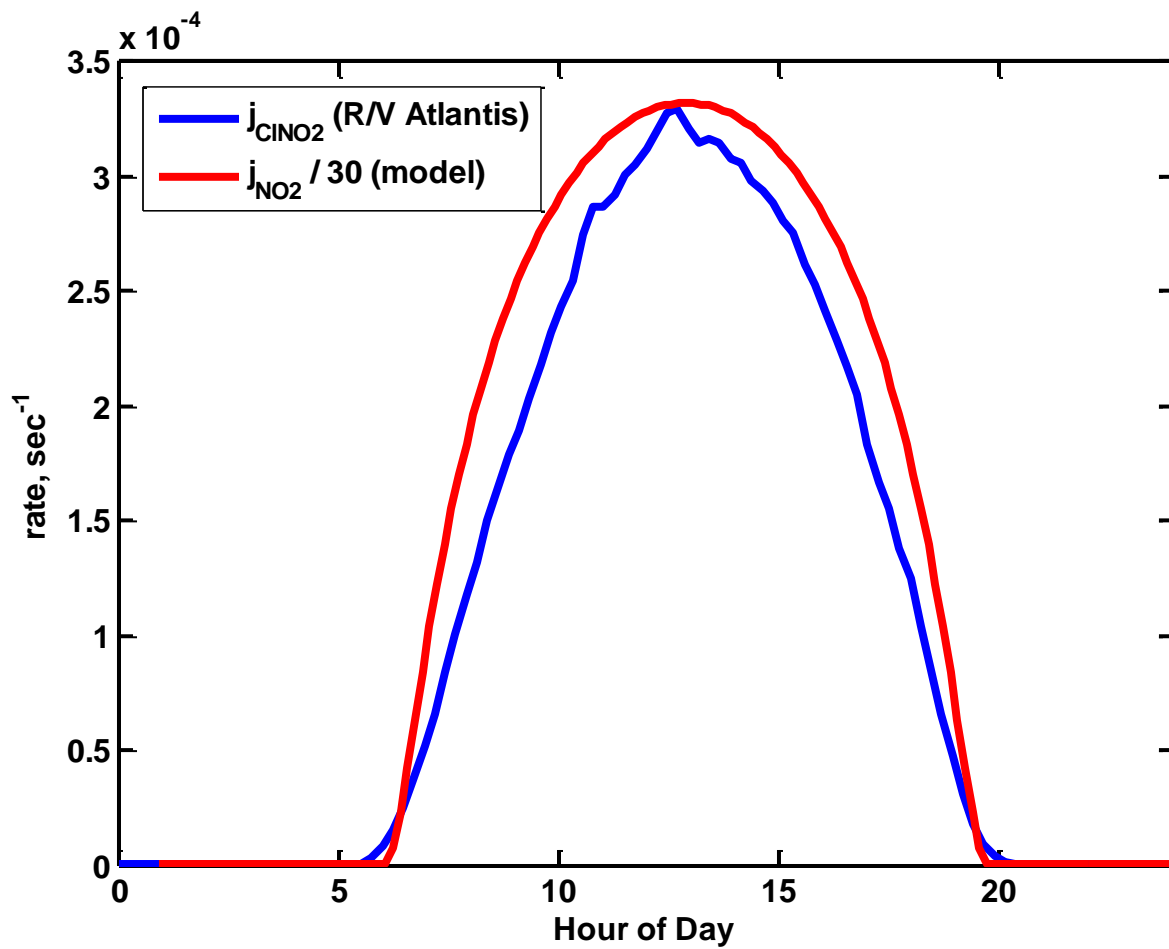

**Figure S-7.** Photolysis frequency comparison between  $j_{\text{ClNO}_2}$  as measured aboard the R/V *Atlantis* and modeled clear sky  $j_{\text{NO}_2}/30$  which used in the model as a proxy for  $j_{\text{ClNO}_2}$ .



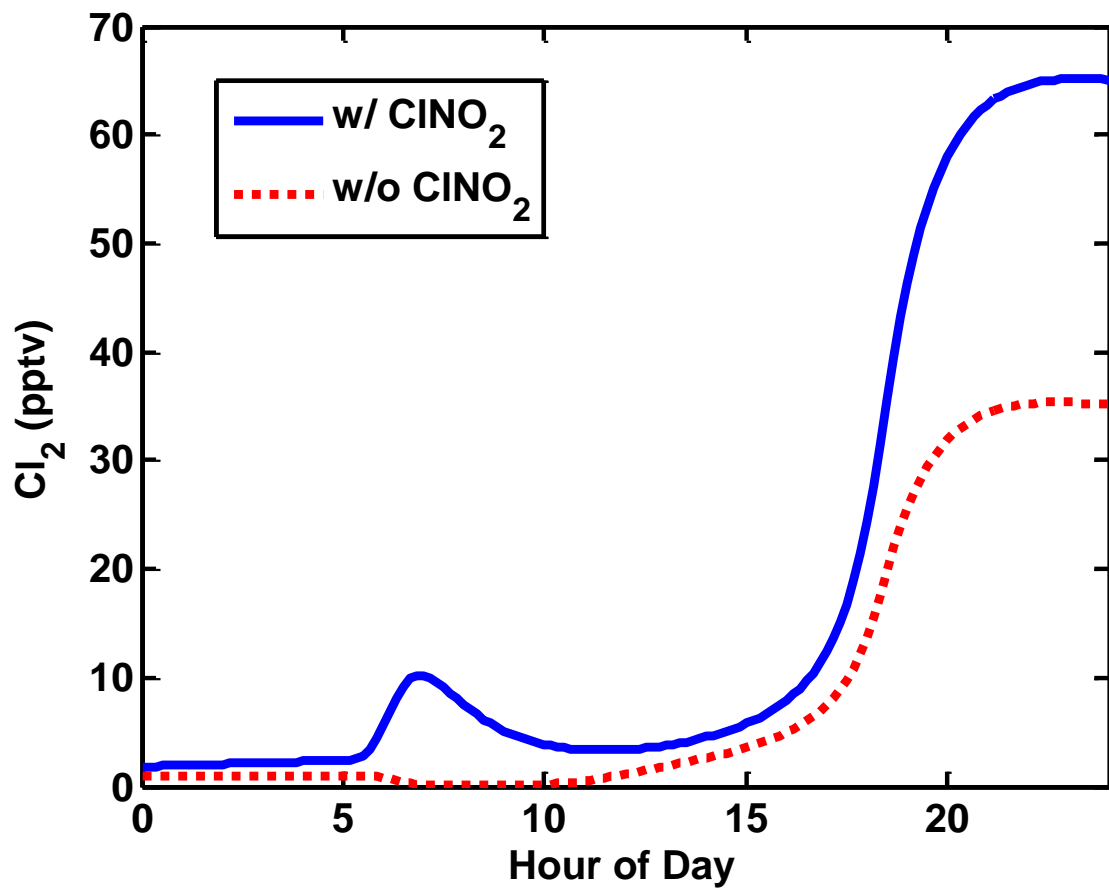

Figure S-8. Effects of  $\text{ClNO}_2$  on the molecular chlorine ( $\text{Cl}_2$ ) levels during a model run.

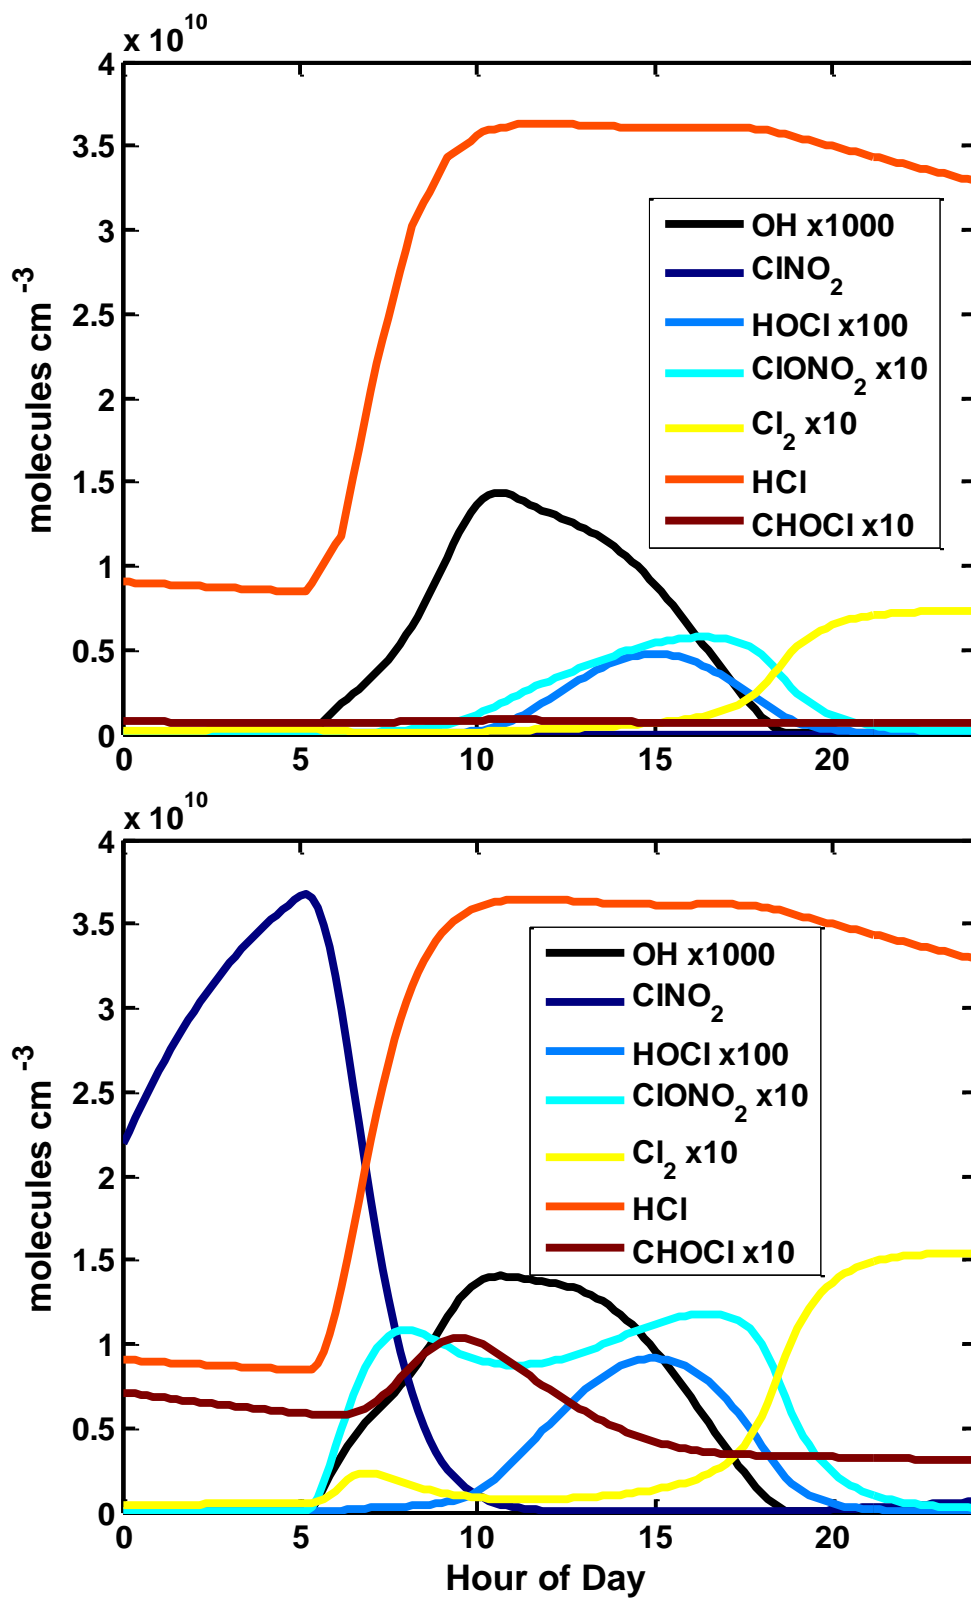

**Figure S-9.** Model concentrations of species relevant to chlorine atom production for the without-CINO<sub>2</sub> (top panel) and with-CINO<sub>2</sub> (bottom panel) model cases.

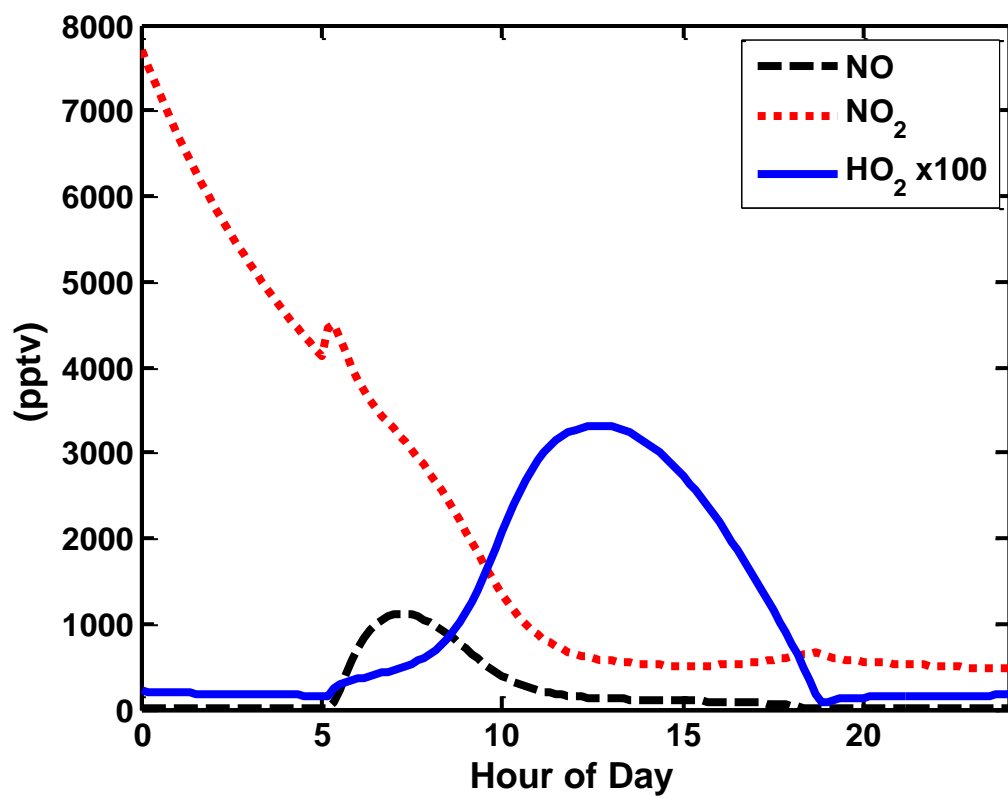

Figure S-10. Model NO, NO<sub>2</sub> and HO<sub>2</sub> mixing ratios for the with-CINO<sub>2</sub> model case.

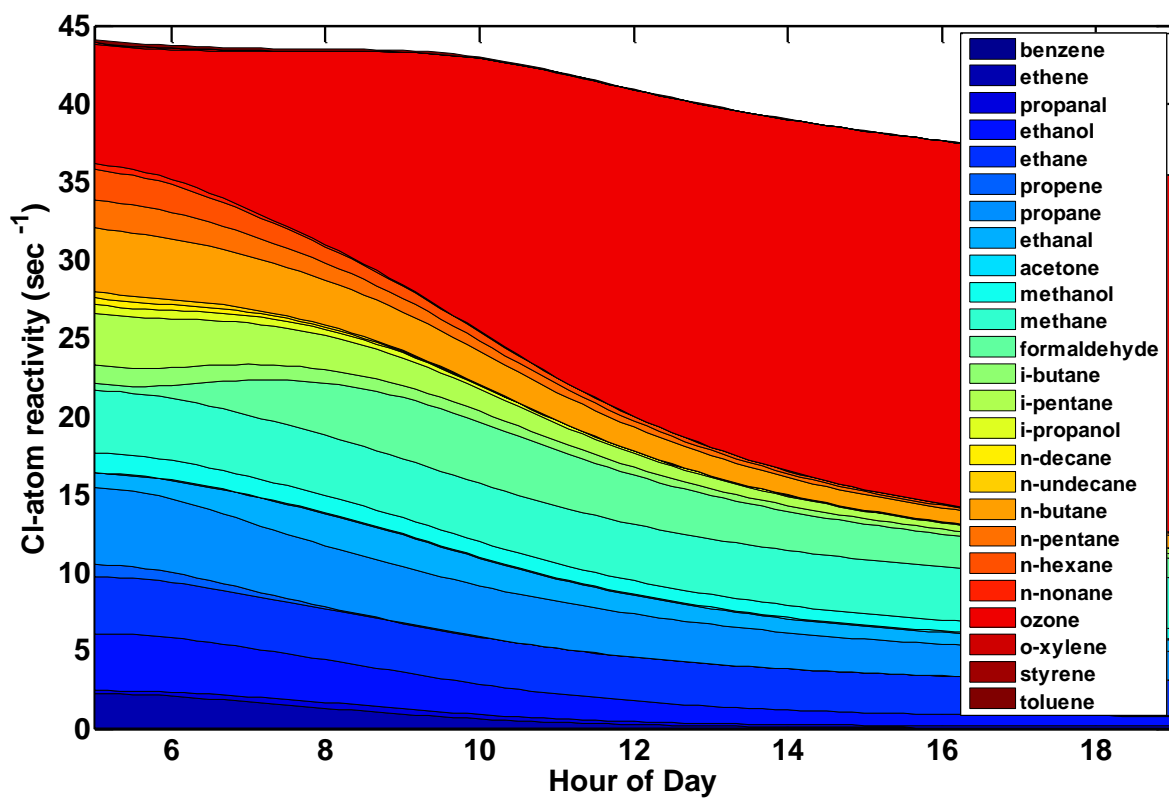

**Figure S-11.** Predicted Cl-atom reactivity over the course of a model day.

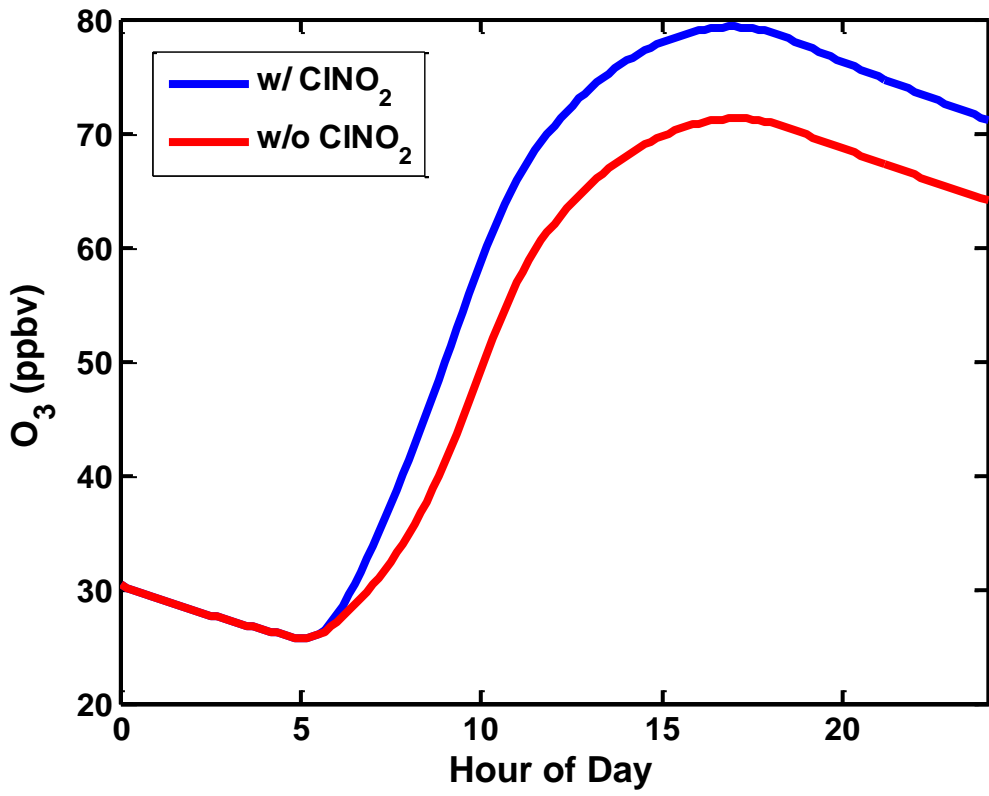

**Figure S-12.** Predicted O<sub>3</sub> mixing ratios for the with- and without-ClNO<sub>2</sub> model cases.
